# Supplementary material for: Sensory experience modulates the reorganization of auditory regions for executive processing
Source: PubMed Central journal article supplement (PMC9586534; doi:10.1093/brain/awac205), 2022-06-02
Supplement: awac205_supplementary_data.pdf [file awac205_supplementary_data.pdf]

# Sensory experience modulates the reorganisation of auditory regions for executive processing

Manini, Vinogradova et al.

## Supplementary Figures

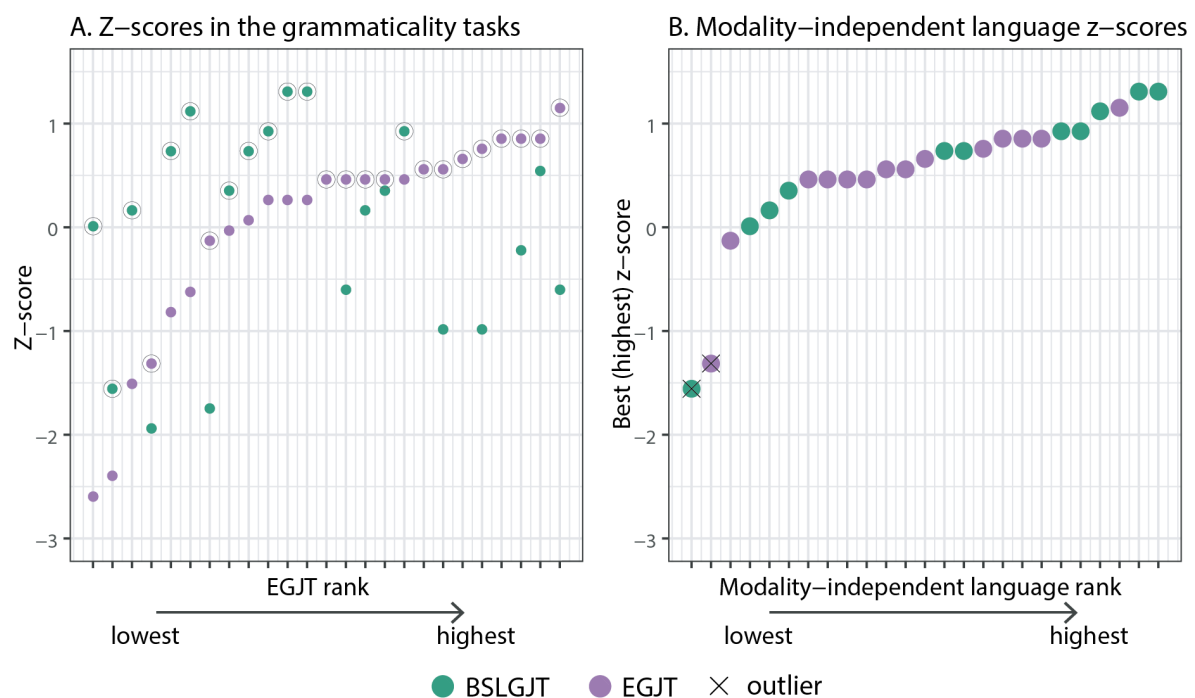

**Supplementary Figure 1. Language proficiency in the deaf group.** A Language z-scores in the English grammaticality judgement task (EGJT) and BSL grammaticality judgement task (BSLGJT), with participants sorted on the x-axis by their EGJT rank. Black circles indicate the z-score chosen for the combined modality-independent language score.

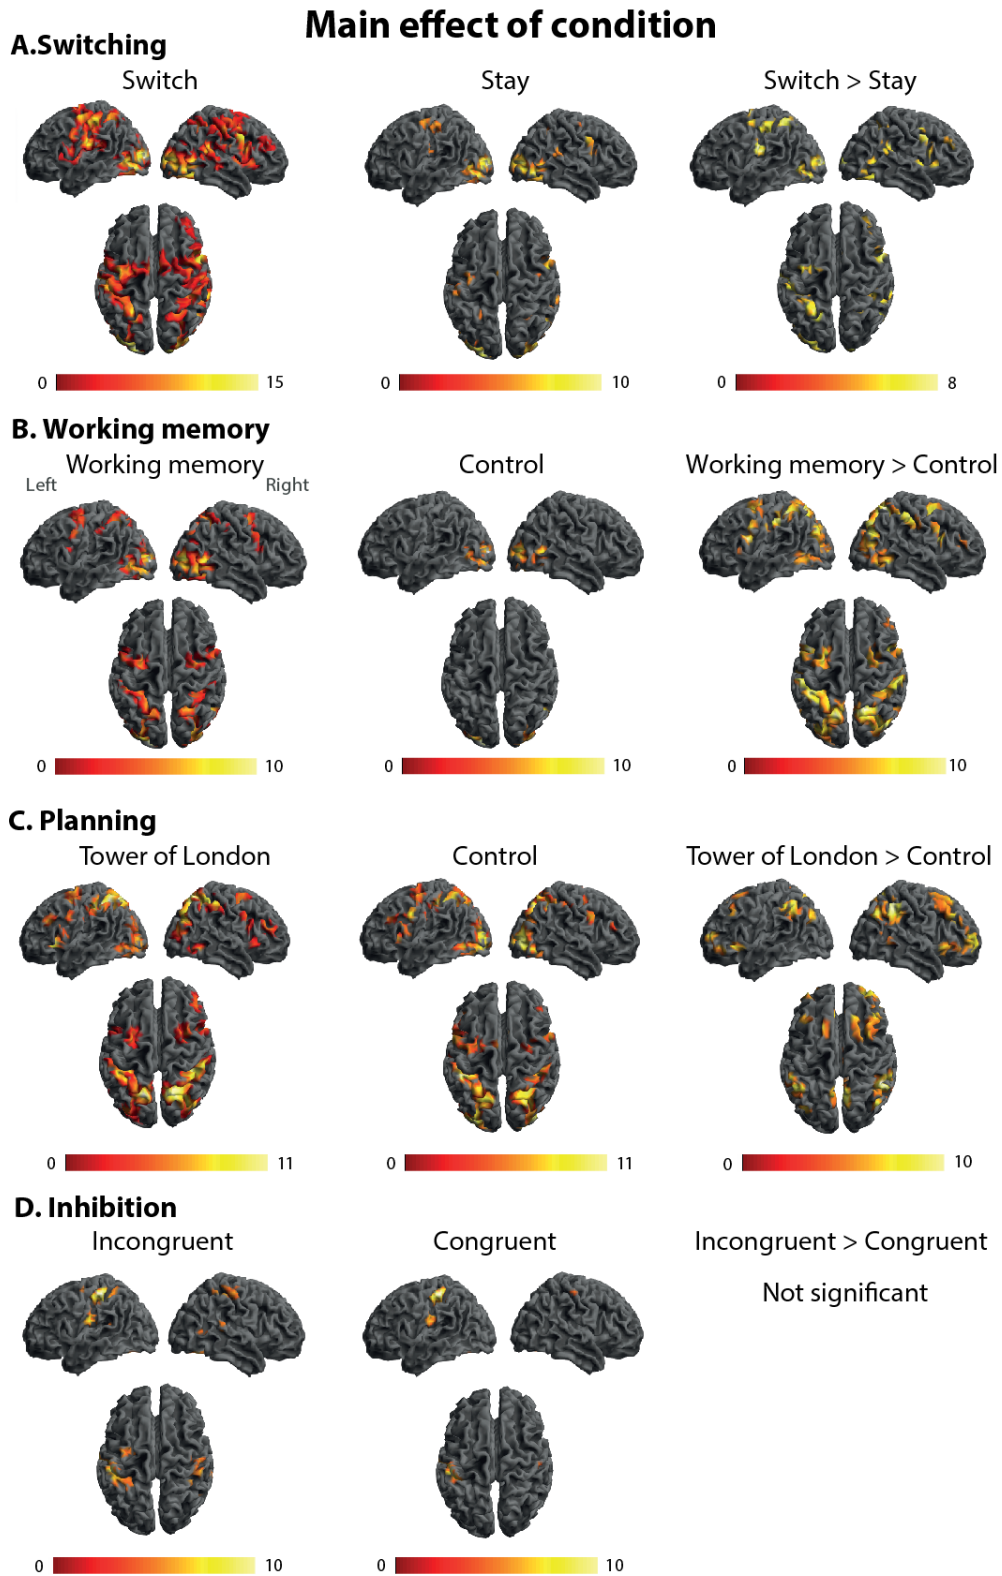

**Supplementary Figure 2. Whole-brain main effects of condition in each EF task.** Activations for each EF task and condition averaged across groups. All contrasts were calculated across both groups, and are displayed at  $p < 0.05$  (FWE-corrected). Colour bars represent z-scores. Coordinates of peak activations for the contrast [HEF > LEF] can be found here: <https://osf.io/87vur/>

## Supplementary Tables

**Supplementary Table 1.** Demographics and pre-screening tests

|                                    | Age           |       | Gender | WASI  |      | Corsi |      |
|------------------------------------|---------------|-------|--------|-------|------|-------|------|
|                                    | Mean (range)  | SD    |        | Mean  | SD   | Mean  | SD   |
| <b>Full sample</b><br>hearing N=20 | 37.50 (18-66) | 16.85 | 15f/5m | 57.47 | 8.02 | 5.4   | 1.1  |
| <b>Full sample</b><br>deaf N=25    | 41.68 (19-66) | 14.38 | 16f/9m | 59.68 | 8.51 | 5.3   | 0.78 |
| <b>Switching</b><br>hearing N=20   | 37.50 (18-66) | 16.85 | 15f/5m | 57.47 | 8.02 | 5.4   | 1.1  |
| <b>Switching</b><br>deaf N=23      | 40.3 (19-63)  | 13.93 | 14f/9m | 59.87 | 8.76 | 5.39  | 0.71 |
| <b>WM</b><br>hearing N=19          | 38.47 (18-66) | 16.72 | 14f/5m | 57.83 | 8.1  | 5.47  | 1.08 |
| <b>WM</b><br>deaf N=24             | 41.38 (19-66) | 14.6  | 15f/9m | 59.96 | 8.58 | 5.38  | 0.70 |
| <b>Planning</b><br>hearing N=19    | 36.95 (18-66) | 17.13 | 14f/5m | 57.56 | 8.25 | 5.44  | 1.11 |
| <b>Planning</b><br>deaf N=21       | 40.81 (19-63) | 13.65 | 13f/8m | 59.67 | 9.19 | 5.26  | 0.82 |
| <b>Inhibition</b><br>hearing N=15  | 40.33 (18-66) | 17.09 | 12f/3m | 57.57 | 9.05 | 5.43  | 1.21 |
| <b>Inhibition</b><br>deaf N=22     | 40.59 (19-66) | 14.87 | 14f/8m | 60.05 | 8.84 | 5.43  | 0.70 |

See Supplementary Table 4 for exclusion criteria from individual tasks. One participant in the hearing group did not complete the nonverbal IQ assessment<sup>3</sup> and the visuospatial working memory Corsi task<sup>4</sup>.

**Supplementary Table 2.**

Between-group comparisons on demographics and pre-screening tests

|                   | N       |      | Age       |          |          | Gender   |          | WASI      |          |          | Corsi     |          |          |
|-------------------|---------|------|-----------|----------|----------|----------|----------|-----------|----------|----------|-----------|----------|----------|
|                   | hearing | deaf | <i>df</i> | <i>t</i> | <i>p</i> | $\chi^2$ | <i>p</i> | <i>df</i> | <i>t</i> | <i>p</i> | <i>df</i> | <i>t</i> | <i>p</i> |
| <b>Switching</b>  | 20      | 23   | 1,41      | 0.6      | 0.55     | 0.97     | 0.32     | 1,40      | 0.92     | 0.37     | 1,40      | -0.01    | 0.99     |
| <b>WM</b>         | 19      | 24   | 1,41      | 0.6      | 0.55     | 0.6      | 0.45     | 1,40      | 0.81     | 0.42     | 1,40      | -0.36    | 0.72     |
| <b>Planning</b>   | 19      | 21   | 1,38      | 0.79     | 0.43     | 0.63     | 0.43     | 1,37      | 0.75     | 0.46     | 1,37      | -0.59    | 0.56     |
| <b>Inhibition</b> | 15      | 22   | 1,35      | 0.05     | 0.96     | 1.14     | 0.29     | 1,34      | 0.81     | 0.42     | 1,34      | 0.01     | 0.99     |

See Supplementary Table 4 for exclusion criteria from individual tasks.

**Supplementary Table 3.** Cause of deafness and language background of the deaf participants

| <b>Age</b> | <b>Onset of deafness</b> | <b>Cause of deafness</b> | <b>Native language</b>    | <b>Preferred language</b> | <b>Other languages</b> |
|------------|--------------------------|--------------------------|---------------------------|---------------------------|------------------------|
| 19         | 0                        | Genetic                  | BSL                       | BSL                       |                        |
| 21         | < 3 years old            | Genetic                  | BSL                       | BSL                       |                        |
| 22         | 0                        | Genetic                  | English, BSL              | English                   |                        |
| 22         | 0                        | Unknown                  | BSL                       | BSL                       |                        |
| 23         | 0                        | Genetic                  | BSL                       | BSL                       | ASL                    |
| 27         | 0                        | Genetic                  | English                   | English                   | BSL                    |
| 29         | 0                        | Genetic                  | English                   | English                   |                        |
| 30         | < 3 years old            | Genetic                  | Auslan                    | Auslan                    | BSL, ASL               |
| 30         | 0                        | Unknown                  | English                   | English                   | BSL                    |
| 40         | 0                        | Unknown                  | English                   | English                   | BSL                    |
| 43         | 0                        | Genetic                  | BSL                       | BSL                       |                        |
| 44         | 0                        | Mother had infection     | Gesture/home sign         | BSL                       |                        |
| 45         | 0                        | Mother had rubella       | English                   | English                   | BSL                    |
| 47         | 0                        | Unknown                  | English                   | BSL                       |                        |
| 48         | 0                        | Genetic                  | English                   | BSL                       |                        |
| 49         | < 3 years old            | Meningitis               | Gesture or home sign, BSL | BSL                       |                        |
| 49         | 0                        | Genetic                  | English                   | English                   |                        |
| 50         | < 3 years old            | Genetic                  | English                   | BSL                       |                        |
| 51         | 0                        | Genetic                  | English                   | BSL                       |                        |
| 52         | 0                        | Mother had rubella       | English                   | English                   |                        |
| 56         | 0                        | Genetic                  | English                   | BSL                       |                        |
| 57         | 0                        | Genetic                  | English                   | English                   |                        |
| 59         | 0                        | Genetic                  | BSL                       | BSL                       |                        |
| 63         | 0                        | Mother had rubella       | English                   | English                   | BSL                    |
| 66         | 0                        | Other                    | English                   | BSL                       | SASL                   |

ASL=American Sign Language, BSL=British Sign Language, SASL=South African Sign Language.  
 Participants' IDs have been removed to avoid identification.

**Supplementary Table 4.** List of participants excluded from the analysis of each task

| <b>Group</b> | <b>ID</b> | <b>Switching</b> | <b>Working memory</b> | <b>Planning</b> | <b>Inhibition</b> |
|--------------|-----------|------------------|-----------------------|-----------------|-------------------|
| Hearing      | 3         |                  | low accuracy          |                 | not performed     |
| Hearing      | 4         |                  |                       |                 | not performed     |
| Hearing      | 6         |                  |                       |                 | not performed     |
| Hearing      | 11        |                  |                       |                 | low accuracy      |
| Hearing      | 13        |                  |                       |                 | not performed     |
| Hearing      | 16        |                  |                       | low accuracy    |                   |
| Deaf         | 103       | not performed    |                       | not performed   |                   |
| Deaf         | 104       |                  |                       |                 | not performed     |
| Deaf         | 106       |                  |                       | low accuracy    | not performed     |
| Deaf         | 113       | low accuracy     | low accuracy          |                 | low accuracy      |
| Deaf         | 114       |                  |                       | movement        |                   |
| Deaf         | 130       |                  |                       | low accuracy    |                   |

“Low accuracy” means the participant had <55% correct answers for that task.

**Supplementary Table 5.**

Results from repeated-measures ANOVAs on behavioural performance

|                          | <b>Switching</b>              |                  | <b>WM</b>                      |                  | <b>Planning</b>                |                  | <b>Inhibition</b>             |                  |
|--------------------------|-------------------------------|------------------|--------------------------------|------------------|--------------------------------|------------------|-------------------------------|------------------|
| <b>Accuracy</b>          |                               |                  |                                |                  |                                |                  |                               |                  |
|                          | <i>F (df)</i>                 | <i>p</i>         | <i>F (df)</i>                  | <i>p</i>         | <i>F (df)</i>                  | <i>p</i>         | <i>F (df)</i>                 | <i>p</i>         |
| <b>Condition</b>         | <b>28.27</b><br><b>(1,41)</b> | <b>&lt;0.001</b> | <b>91.59</b><br><b>(1,41)</b>  | <b>&lt;0.001</b> | <b>46.88</b><br><b>(1,38)</b>  | <b>&lt;0.001</b> | <b>17.57</b><br><b>(1,35)</b> | <b>&lt;0.001</b> |
| <b>Group</b>             | <b>4.32 (1,41)</b>            | <b>0.04</b>      | 0.03<br>(1,41)                 | 0.86             | 0.86<br>(1,38)                 | 0.36             | 0.24<br>(1,35)                | 0.63             |
| <b>Condition × Group</b> | <b>4.98 (1,41)</b>            | <b>0.03</b>      | 0.3 (1,41)                     | 0.59             | 0.01<br>(1,38)                 | 0.92             | 0.00<br>(1,35)                | 0.98             |
| <b>Reaction time</b>     |                               |                  |                                |                  |                                |                  |                               |                  |
|                          | <i>F (df)</i>                 | <i>p</i>         | <i>F (df)</i>                  | <i>p</i>         | <i>F (df)</i>                  | <i>p</i>         | <i>F (df)</i>                 | <i>p</i>         |
| <b>Condition</b>         | <b>21.6 (1,41)</b>            | <b>&lt;0.001</b> | <b>199.22</b><br><b>(1,41)</b> | <b>&lt;0.001</b> | <b>211.64</b><br><b>(1,38)</b> | <b>&lt;0.001</b> | <b>79.2</b><br><b>(1,35)</b>  | <b>&lt;0.001</b> |
| <b>Group</b>             | <b>4.5 (1,41)</b>             | <b>0.04</b>      | <b>8.11</b><br><b>(1,41)</b>   | <b>0.007</b>     | <b>10.96</b><br><b>(1,38)</b>  | <b>0.002</b>     | <b>4.91</b><br><b>(1,35)</b>  | <b>0.03</b>      |
| <b>Condition × Group</b> | 0.03 (1,41)                   | 0.87             | 0.0 (1,41)                     | 0.97             | 0.06<br>(1,38)                 | 0.8              | 0.35<br>(1,35)                | .56              |

Factors in the analysis were: condition (HEF, LEF) and group (hearing, deaf). Significant effects are shown in bold.

**Supplementary Table 6.**

Paired samples t-tests (switch v stay) for each group and ROI in the switching task.

|                                       | Hearing group<br><i>df= 19</i> |          |          |                  |          |          | Deaf group<br><i>df= 22</i> |              |             |                  |                  |             |
|---------------------------------------|--------------------------------|----------|----------|------------------|----------|----------|-----------------------------|--------------|-------------|------------------|------------------|-------------|
|                                       | Left hemisphere                |          |          | Right hemisphere |          |          | Left hemisphere             |              |             | Right hemisphere |                  |             |
|                                       | <i>t</i>                       | <i>p</i> | <i>d</i> | <i>t</i>         | <i>p</i> | <i>d</i> | <i>t</i>                    | <i>p</i>     | <i>d</i>    | <i>t</i>         | <i>p</i>         | <i>d</i>    |
| Heschl's gyrus                        | 0.41                           | 0.68     | 0.10     | 0.35             | 0.73     | 0.08     | <b>3.38</b>                 | <b>0.003</b> | <b>0.71</b> | 1.58             | 0.13             | 0.33        |
| Planum<br>temporale                   | 0.21                           | 0.84     | 0.05     | 0.27             | 0.79     | 0.06     | <b>3.55</b>                 | <b>0.002</b> | <b>0.74</b> | <b>5.25</b>      | <b>&lt;0.001</b> | <b>1.10</b> |
| Posterior superior<br>temporal cortex | -0.22                          | 0.82     | -0.05    | 0.58             | 0.57     | 0.13     | <b>3.32</b>                 | <b>0.003</b> | <b>0.69</b> | <b>5.31</b>      | <b>&lt;0.001</b> | <b>1.11</b> |

Significant results are shown in bold. The following correction for multiple comparison was applied: results are considered significant when  $p < 0.004$  ( $p < 0.05/12 = 0.004$ ; corrected  $p < 0.05$ ).
